# Supplementary material for: With a Hint of Sudachi: Food Plating Can Facilitate the Fondness of Food
Source: Front Psychol. 2021 Oct 15;12:699218. doi: 10.3389/fpsyg.2021.699218 (PMC8555489; doi:10.3389/fpsyg.2021.699218)
Supplement: Supplementary file 1 [file Data_Sheet_1.XLSX]

## Sheet: sensory evaluation
Tomato	appetite	freshness	dryness	glossiness	warmth	sourness	sweetness	saltiness	looking	fondness	deliciousness
	1	6	2	5	1	4	4	5	5	3	5
	3	5	3	5	3	3	3	5	5	2	5
	5	5	3	3	2	1	1	5	5	5	6
	3	3	5	3	3	3	3	5	2	5	2
	2	3	5	2	2	1	1	1	3	5	5
	4	6	3	6	4	3	5	4	5	3	5
	6	6	3	7	3	5	6	3	6	6	6
	6	1	3	6	5	3	5	5	5	5	5
	6	7	1	7	5	5	3	5	7	5	6
	5	6	2	7	4	4	5	5	6	6	6
	5	5	2	5	2	5	6	3	5	5	5
	6	7	1	7	3	5	3	3	6	6	2
	2	6	2	6	6	5	5	6	6	2	6
	7	6	1	6	5	5	6	5	7	7	7
	1	5	4	6	4	5	5	3	3	1	1
Ave	4.13333	5.13333	2.66667	5.4	3.46667	3.8	4.06667	4.2	5.06667	4.4	4.8
NOTHING	appetite	freshness	dryness	glossiness	warmth	sourness	sweetness	saltiness	looking	fondness	deliciousness
	1	1	6	2	1	1	1	4	5	1	1
	2	3	3	4	5	2	3	6	5	3	4
	5	3	3	3	3	1	1	5	3	5	5
	6	5	4	5	6	2	5	3	3	5	5
	3	4	5	2	3	1	7	1	4	5	5
	4	4	5	1	4	4	4	4	3	4	4
	6	6	5	2	5	5	1	5	3	5	5
	6	1	2	3	6	1	5	2	3	5	6
	6	5	3	5	5	1	2	5	5	6	6
	5	6	3	5	2	2	4	5	4	5	6
	4	2	5	2	2	3	5	6	3	5	4
	5	3	3	5	3	1	1	5	5	5	5
	6	4	4	4	6	1	1	6	3	5	6
	6	5	3	5	5	2	5	5	5	5	5
	5	4	4	1	4	1	4	4	3	5	5
Ave	4.66667	3.73333	3.86667	3.26667	4	1.86667	3.26667	4.4	3.8	4.6	4.8
cookie	appetite	freshness	dryness	glossiness	warmth	sourness	sweetness	saltiness	looking	fondness	deliciousness
	1	2	2	2	1	1	5	3	1	1	1
	2	2	5	3	3	2	6	3	3	2	2
	3	3	6	2	5	1	1	5	2	3	3
	7	5	3	6	7	2	3	3	3	7	7
	6	4	4	5	6	1	6	5	6	6	6
	4	4	5	1	4	4	4	3	3	3	5
	2	3	6	2	2	1	5	2	2	1	3
	6	7	6	1	1	1	6	6	5	6	6
	5	4	5	2	5	1	5	5	5	5	4
	3	4	2	5	6	1	5	5	6	4	4
	5	3	6	2	4	2	6	3	5	5	6
	3	3	6	1	3	1	5	2	3	3	3
	1	1	7	1	3	1	6	5	1	1	2
	1	2	6	1	1	1	6	2	2	2	2
	7	4	5	4	4	1	5	4	5	6	6
Ave	3.73333	3.4	4.93333	2.53333	3.66667	1.4	4.93333	3.73333	3.46667	3.66667	4
NUTS	appetite	freshness	dryness	glossiness	warmth	sourness	sweetness	saltiness	looking	fondness	deliciousness
	1	1	7	1	1	1	1	1	1	1	1
	2	2	6	2	2	4	3	5	2	3	3
	2	3	5	3	5	2	2	5	4	5	6
	2	3	5	3	3	2	3	3	1	2	1
	3	1	6	1	2	1	1	5	1	2	2
	5	4	7	4	4	4	5	5	4	5	5
	2	2	7	1	3	2	5	5	1	1	2
	3	6	6	2	5	2	2	5	2	2	3
	6	3	5	3	3	1	6	3	3	6	5
	5	4	3	4	5	2	4	4	5	4	5
	3	1	7	1	1	2	3	5	5	5	3
	5	3	5	2	2	1	3	3	3	5	3
	3	4	6	1	4	1	5	7	2	2	5
	5	3	4	2	3	1	5	5	5	5	5
	6	4	4	2	3	1	5	5	5	5	5
Ave	3.53333	2.93333	5.53333	2.13333	3.06667	1.8	3.53333	4.4	2.93333	3.53333	3.6
bread	appetite	freshness	dryness	glossiness	warmth	sourness	sweetness	saltiness	looking	fondness	deliciousness
	3	1	7	1	1	1	2	1	3	1	5
	5	2	5	3	3	4	4	4	3	4	5
	2	3	5	3	5	2	1	3	1	1	3
	7	6	3	6	6	1	5	3	5	7	7
	2	3	7	1	5	1	1	3	2	2	2
	4	4	6	3	5	4	5	4	4	4	4
	1	2	6	2	5	1	5	5	1	1	2
	6	1	5	2	5	2	5	5	6	6	6
	6	6	5	3	6	1	5	5	6	6	6
	4	2	5	3	3	4	4	5	3	2	3
	3	3	6	3	3	2	5	3	3	3	3
	3	3	5	3	3	1	5	4	2	2	3
	4	4	6	2	3	1	1	5	3	3	4
	2	2	7	2	2	2	5	1	1	2	2
	6	4	6	4	5	1	4	5	7	7	6
Ave	3.86667	3.06667	5.6	2.73333	4	1.86667	3.8	3.73333	3.33333	3.4	4.06667
echallot (rakyo)	appetite	freshness	dryness	glossiness	warmth	sourness	sweetness	saltiness	looking	fondness	deliciousness
	1	1	3	5	1	5	1	1	5	1	2
	2	4	5	3	3	4	4	5	3	3	3
	7	6	3	6	6	5	1	6	5	6	6
	5	6	3	6	6	3	5	7	6	6	6
	5	6	2	5	5	6	1	7	5	4	4
	5	4	3	5	4	5	3	5	4	5	5
	5	5	3	6	5	6	3	2	2	2	2
	3	3	5	5	3	5	2	5	1	2	3
	5	3	5	3	3	5	2	3	3	6	3
	4	3	2	6	5	4	5	5	4	3	5
	3	6	2	5	3	7	3	6	2	2	3
	2	5	1	6	5	5	3	5	3	2	2
	2	2	2	6	3	6	5	6	2	2	5
	2	3	2	5	3	6	5	6	5	2	3
	5	4	4	4	4	5	5	5	3	5	5
Ave	3.73333	4.06667	3	5.06667	3.93333	5.13333	3.2	4.93333	3.53333	3.4	3.8
pickled-ginger	appetite	freshness	dryness	glossiness	warmth	sourness	sweetness	saltiness	looking	fondness	deliciousness
	1	1	2	5	1	1	1	1	1	1	1
	5	3	5	3	2	4	5	5	5	5	5
	3	3	3	5	2	5	5	5	3	2	3
	6	5	3	5	5	7	2	5	5	5	6
	5	5	3	5	6	3	2	5	5	4	5
	5	4	5	3	4	4	4	4	3	4	4
	5	5	6	3	5	5	1	5	5	5	5
	6	2	2	1	3	1	2	2	3	5	6
	5	2	5	3	2	3	1	5	3	6	5
	3	3	7	5	2	4	4	3	3	4	5
	3	6	3	5	3	6	3	6	4	4	5
	3	5	3	5	3	5	2	5	3	3	3
	2	2	2	6	2	4	4	5	2	1	2
	3	3	3	5	5	6	5	5	5	3	5
	3	4	3	5	4	6	5	4	3	3	5
Ave	3.86667	3.53333	3.66667	4.26667	3.26667	4.26667	3.06667	4.33333	3.53333	3.66667	4.33333
boiled-egg	appetite	freshness	dryness	glossiness	warmth	sourness	sweetness	saltiness	looking	fondness	deliciousness
	3	1	6	2	1	1	1	2	2	2	2
	5	6	5	3	6	3	2	6	6	6	6
	2	3	6	2	5	1	1	3	2	2	2
	2	1	7	1	1	3	2	7	1	1	1
	3	2	5	2	6	1	1	1	5	3	3
	4	4	4	4	4	4	4	4	5	3	4
	3	5	5	3	5	2	5	3	5	2	3
	6	2	5	2	6	2	5	6	6	5	6
	6	6	3	3	6	3	5	5	6	5	6
	5	5	2	4	4	2	3	5	5	5	5
	5	5	2	5	5	2	5	6	5	5	5
	6	5	5	2	6	1	3	3	6	6	6
	4	4	6	5	5	1	2	4	3	3	5
	6	5	3	4	6	2	5	2	6	6	6
	5	4	4	4	4	1	1	5	3	5	5
Ave	4.33333	3.86667	4.53333	3.06667	4.66667	1.93333	3	4.13333	4.4	3.93333	4.33333
bell pepper	appetite	freshness	dryness	glossiness	warmth	sourness	sweetness	saltiness	looking	fondness	deliciousness
	2	1	6	1	1	1	1	1	3	3	2
	5	3	5	3	3	2	3	6	5	5	5
	6	5	3	5	5	5	1	5	6	5	6
	5	3	6	1	6	3	2	5	5	5	5
	3	5	3	2	3	5	1	1	5	3	3
	4	4	2	6	4	4	5	4	5	4	4
	5	6	5	2	5	3	5	3	5	5	5
	6	2	5	5	5	2	2	3	6	5	5
	5	5	3	5	3	2	5	2	3	3	3
	4	5	3	6	5	4	5	5	6	6	5
	3	3	6	2	2	5	5	2	3	2	2
	6	5	3	3	3	1	5	2	6	6	6
	4	5	3	5	3	5	4	5	2	3	4
	5	5	2	2	5	5	5	5	5	5	5
	1	4	4	5	4	1	1	4	1	1	1
Ave	4.26667	4.06667	3.93333	3.53333	3.8	3.2	3.33333	3.53333	4.4	4.06667	4.06667
lemon	appetite	freshness	dryness	glossiness	warmth	sourness	sweetness	saltiness	looking	fondness	deliciousness
	1	2	3	5	1	7	1	2	7	1	5
	5	6	3	5	5	5	2	2	6	6	6
	7	6	2	6	7	5	1	5	7	7	7
	7	7	3	5	7	5	3	5	7	7	7
	5	5	5	3	5	6	1	1	6	5	5
	5	5	3	4	4	6	4	4	6	3	5
	7	6	2	6	3	7	1	6	7	7	7
	7	1	2	6	7	6	5	6	7	6	7
	7	5	5	3	5	5	2	5	6	7	7
	6	5	5	2	3	5	4	5	3	5	5
	4	2	6	1	5	6	2	7	5	3	3
	5	5	3	5	3	5	3	5	5	5	5
	6	7	3	5	6	5	2	6	7	7	7
	6	6	2	5	6	5	5	5	7	6	7
	7	5	4	4	3	5	1	5	6	7	7
Ave	5.66667	4.86667	3.4	4.33333	4.66667	5.53333	2.46667	4.6	6.13333	5.46667	6
sudachi	appetite	freshness	dryness	glossiness	warmth	sourness	sweetness	saltiness	looking	fondness	deliciousness
	2	3	3	5	1	7	1	2	6	1	5
	3	5	5	3	3	5	3	2	5	5	5
	7	6	2	6	6	6	1	5	7	7	7
	7	7	3	7	6	5	3	3	6	7	7
	5	5	3	5	3	5	1	1	5	6	6
	5	3	5	3	4	5	4	4	5	5	5
	7	6	2	6	3	6	2	6	7	7	7
	6	2	2	5	6	6	5	5	6	5	6
	7	6	3	5	5	5	3	5	6	7	7
	3	5	2	6	5	5	4	4	3	6	3
	7	7	1	5	5	7	5	3	6	6	7
	6	6	2	6	3	6	3	3	6	6	6
	7	6	2	6	6	5	1	6	6	7	6
	6	6	1	6	5	5	5	5	6	6	6
	6	4	2	6	4	6	4	5	5	6	6
Ave	5.6	5.13333	2.53333	5.33333	4.33333	5.6	3	3.93333	5.66667	5.8	5.93333
lettuce	appetite	freshness	dryness	glossiness	warmth	sourness	sweetness	saltiness	looking	fondness	deliciousness
	2	1	5	3	1	1	1	1	5	1	3
	6	6	3	6	5	2	3	3	6	7	7
	6	2	2	6	6	5	1	5	7	6	6
	2	3	6	3	2	3	3	5	1	2	2
	5	6	2	6	6	1	1	1	7	6	5
	4	6	2	4	4	4	5	4	4	4	4
	7	7	2	6	3	5	1	6	7	7	7
	6	1	2	5	6	2	3	6	7	6	6
	7	7	2	5	5	3	5	3	7	7	7
	6	6	3	6	4	4	5	5	7	6	2
	7	6	2	5	3	5	5	3	7	7	7
	5	7	2	6	2	1	2	2	6	6	6
	5	6	2	6	5	1	5	5	6	6	6
	7	6	2	6	5	2	5	5	7	7	7
	3	4	2	6	4	1	1	1	3	2	3
Ave	5.2	4.93333	2.6	5.26667	4.06667	2.66667	3.06667	3.66667	5.8	5.33333	5.2
dill	appetite	freshness	dryness	glossiness	warmth	sourness	sweetness	saltiness	looking	fondness	deliciousness
	1	2	6	2	1	1	1	1	7	2	5
	2	3	5	2	3	2	1	2	2	2	3
	6	6	3	5	7	1	1	5	7	6	6
	6	7	3	5	7	3	3	5	6	7	6
	5	5	3	5	5	1	1	1	6	6	5
	5	5	3	4	4	4	4	4	5	5	3
	7	7	5	5	6	3	3	5	7	7	7
	2	1	5	2	6	2	2	7	7	7	6
	5	3	5	3	2	5	1	3	5	3	5
	6	5	2	6	6	1	4	5	2	6	6
	2	3	6	2	5	5	3	1	3	2	3
	1	3	6	2	2	1	1	2	1	1	2
	5	4	5	3	3	1	1	6	6	3	5
	3	3	5	3	3	1	3	2	5	4	3
	5	6	4	4	4	1	1	4	2	2	5
Ave	4.06667	4.2	4.4	3.53333	4.26667	2.13333	2	3.53333	4.73333	4.2	4.66667
pepper	appetite	freshness	dryness	glossiness	warmth	sourness	sweetness	saltiness	looking	fondness	deliciousness
	1	1	6	2	1	1	1	1	1	1	1
	5	6	2	6	5	2	2	3	3	5	5
	3	5	3	5	7	2	1	5	5	5	3
	5	3	5	3	2	3	3	3	7	7	5
	3	3	3	5	2	1	1	1	5	5	3
	4	4	4	4	4	4	4	4	6	5	4
	6	6	5	5	3	5	2	5	6	6	6
	6	3	5	2	2	2	3	2	4	6	6
	6	5	6	3	5	1	3	5	6	5	3
	6	6	2	6	5	3	2	5	7	6	2
	5	5	3	3	5	5	1	6	6	5	5
	2	5	3	5	2	2	2	3	3	2	1
	3	5	5	3	3	2	1	5	5	3	4
	5	5	5	3	3	1	5	5	5	5	5
	3	4	5	4	4	1	1	4	3	2	5
AVE	4.2	4.4	4.13333	3.93333	3.53333	2.33333	2.13333	3.8	4.8	4.53333	3.86667
coriander	appetite	freshness	dryness	glossiness	warmth	sourness	sweetness	saltiness	looking	fondness	deliciousness
	2	2	6	2	1	1	1	1	7	1	5
	5	3	5	3	5	3	2	3	6	5	5
	5	5	3	5	5	3	1	5	5	5	5
	3	3	5	3	3	2	3	3	5	6	4
	6	6	2	6	6	1	5	1	5	5	5
	5	5	4	5	4	4	4	4	5	4	5
	6	7	1	6	3	5	1	5	7	6	6
	6	1	3	3	6	3	3	6	6	5	6
	6	6	3	5	5	1	3	3	6	5	5
	5	6	2	6	5	2	2	5	7	5	5
	2	3	5	2	5	5	2	3	5	2	2
	3	6	3	5	2	1	1	3	5	3	5
	5	6	2	6	5	4	2	5	5	4	6
	5	6	3	5	5	2	2	5	6	6	5
	6	4	4	5	4	5	1	5	6	5	5
Ave	4.66667	4.6	3.4	4.46667	4.26667	2.8	2.2	3.8	5.73333	4.46667	4.93333
cucumber	appetite	freshness	dryness	glossiness	warmth	sourness	sweetness	saltiness	looking	fondness	deliciousness
	2	2	5	3	1	1	1	1	6	2	5
	5	7	2	5	6	2	2	6	5	6	6
	2	5	3	5	3	2	1	3	3	3	2
	3	3	6	2	1	5	3	5	2	2	3
	2	1	6	3	2	1	1	5	1	2	2
	4	5	4	5	4	4	4	4	5	3	4
	5	5	3	6	3	5	2	5	6	5	5
	6	2	2	5	6	3	3	6	6	6	6
	6	5	3	5	3	5	3	5	6	7	5
	4	5	4	5	4	4	4	3	4	4	4
	3	2	6	1	2	6	3	5	5	5	3
	2	5	3	6	2	1	1	1	5	2	3
	5	7	1	2	4	5	1	5	5	3	5
	6	7	1	7	6	2	5	6	6	6	7
	7	4	2	6	4	1	4	5	5	6	6
Ave	4.13333	4.33333	3.4	4.4	3.4	3.13333	2.53333	4.33333	4.66667	4.13333	4.4
parcely	appetite	freshness	dryness	glossiness	warmth	sourness	sweetness	saltiness	looking	fondness	deliciousness
	1	2	6	2	1	1	1	1	7	1	5
	5	6	5	5	6	2	2	2	6	5	5
	7	6	5	3	5	1	1	4	6	6	6
	7	7	3	5	6	3	6	2	6	7	7
	5	5	6	3	5	1	1	1	5	5	5
	5	4	3	4	4	4	4	4	4	4	4
	7	7	7	5	3	5	2	6	7	7	7
	6	1	3	5	6	2	5	6	7	6	7
	6	5	5	3	5	3	2	3	6	7	6
	5	6	2	2	4	2	5	5	7	6	6
	5	5	3	5	5	7	3	5	6	3	5
	5	5	3	3	3	1	1	3	5	3	5
	7	6	5	5	6	4	1	5	7	6	6
	5	6	2	5	6	1	3	2	6	6	5
	3	4	4	5	4	1	4	2	5	5	5
Ave	5.26667	5	4.13333	4	4.6	2.53333	2.73333	3.4	6	5.13333	5.6
itallian parcely	appetite	freshness	dryness	glossiness	warmth	sourness	sweetness	saltiness	looking	fondness	deliciousness
	1	5	3	5	1	1	1	1	5	1	1
	3	3	5	3	3	2	3	5	3	3	3
	6	5	3	5	6	2	2	2	7	7	6
	3	6	5	3	1	4	2	5	5	6	3
	5	5	3	5	3	1	1	1	5	5	6
	4	4	4	4	4	4	4	4	3	3	4
	6	6	5	3	5	5	2	5	6	6	6
	5	3	5	3	6	2	3	5	6	5	5
	6	5	3	3	3	3	2	5	5	6	5
	6	5	4	6	6	3	4	5	7	6	6
	3	3	5	2	3	6	2	6	5	5	3
	3	5	1	6	3	2	1	3	3	2	3
	5	5	4	5	5	2	1	5	5	4	5
	5	5	2	5	5	1	5	5	5	5	5
	5	4	4	3	4	4	4	5	3	5	5
Ave	4.4	4.6	3.73333	4.06667	3.86667	2.8	2.46667	4.13333	4.86667	4.6	4.4
basil	appetite	freshness	dryness	glossiness	warmth	sourness	sweetness	saltiness	looking	fondness	deliciousness
	1	5	3	5	1	1	1	1	7	1	3
	3	5	5	3	5	1	1	5	5	3	3
	6	6	6	3	6	3	1	3	6	6	6
	7	7	1	7	7	3	5	5	7	7	7
	6	5	3	5	5	1	1	1	6	6	5
	4	4	4	4	4	4	3	4	4	4	4
	7	6	5	5	5	5	5	5	7	7	7
	2	3	3	3	6	3	3	5	6	5	5
	6	5	5	5	5	3	3	5	5	6	5
	5	5	3	5	4	3	4	3	5	5	4
	6	5	2	6	5	5	3	2	6	6	6
	2	6	1	6	3	1	1	3	3	2	3
	4	5	4	5	3	4	4	5	3	3	5
	5	5	3	5	5	3	5	5	5	5	5
	5	4	2	5	4	1	4	4	5	5	5
Ave	4.6	5.06667	3.33333	4.8	4.53333	2.73333	2.93333	3.73333	5.33333	4.73333	4.86667
mint	appetite	freshness	dryness	glossiness	warmth	sourness	sweetness	saltiness	looking	fondness	deliciousness
	1	2	6	2	1	1	1	1	7	1	5
	3	5	5	5	6	2	1	3	3	2	3
	5	6	6	5	6	2	1	3	5	2	5
	5	5	3	5	5	5	3	3	3	5	5
	3	2	5	3	2	1	5	1	3	2	3
	4	4	4	4	4	4	4	4	4	4	5
	7	6	5	2	5	5	1	5	7	7	7
	5	5	5	3	3	3	5	5	3	2	5
	6	3	5	3	3	3	3	3	5	5	3
	5	5	2	5	3	1	6	5	5	4	4
	2	5	4	5	2	5	1	2	3	2	2
	5	6	4	3	2	1	2	3	5	5	5
	5	4	5	3	3	1	1	5	5	4	5
	1	3	6	2	2	2	2	1	3	2	2
	3	4	4	4	4	1	1	4	3	2	3
Ave	4	4.33333	4.6	3.6	3.4	2.46667	2.46667	3.2	4.26667	3.26667	4.13333
sansho	appetite	freshness	dryness	glossiness	warmth	sourness	sweetness	saltiness	looking	fondness	deliciousness
	1	2	6	2	1	1	1	1	1	1	1
	5	5	5	3	5	3	2	5	6	6	6
	5	5	5	5	6	2	1	2	5	6	6
	7	7	1	7	7	1	5	5	7	7	7
	3	3	5	3	2	1	1	1	6	6	4
	4	4	4	3	4	4	4	4	5	4	4
	7	6	6	3	5	3	1	3	7	7	7
	6	2	3	5	5	2	2	6	6	3	6
	6	5	5	3	3	5	2	5	5	3	5
	6	6	2	7	6	1	2	5	6	7	7
	1	3	5	2	2	6	1	2	7	6	1
	1	3	5	2	2	1	1	3	1	2	1
	6	4	5	4	3	2	1	6	5	5	6
	3	5	5	3	3	2	3	5	3	3	3
	3	4	4	4	4	4	1	4	1	2	2
Ave	4.26667	4.26667	4.4	3.73333	3.86667	2.53333	1.86667	3.8	4.73333	4.53333	4.4
rosemary	appetite	freshness	dryness	glossiness	warmth	sourness	sweetness	saltiness	looking	fondness	deliciousness
	1	2	7	1	1	1	1	1	2	1	2
	2	2	5	3	2	2	3	2	2	2	3
	7	6	3	6	6	1	1	5	5	7	7
	7	6	2	7	6	3	3	6	6	6	7
	6	5	3	5	3	1	1	1	6	6	6
	5	4	4	4	4	4	4	4	4	5	4
	7	6	6	2	5	3	2	5	6	6	6
	6	1	3	5	6	5	3	5	6	6	6
	5	5	5	3	5	3	3	3	5	3	5
	5	5	5	5	5	4	4	4	5	2	5
	6	5	5	3	3	7	2	7	6	6	6
	3	3	4	3	3	1	1	3	3	2	3
	4	3	5	3	4	5	4	5	3	2	5
	3	5	5	3	3	1	3	2	3	4	4
	6	4	5	4	4	1	4	5	5	6	6
Ave	4.86667	4.13333	4.46667	3.8	4	2.8	2.6	3.86667	4.46667	4.26667	5
seaweed	appetite	freshness	dryness	glossiness	warmth	sourness	sweetness	saltiness	looking	fondness	deliciousness
	2	1	7	1	1	1	1	6	3	5	5
	3	3	6	2	3	2	2	1	3	3	3
	5	4	5	3	6	2	1	5	5	6	6
	6	7	2	6	2	3	2	6	7	6	7
	6	3	5	2	5	1	1	1	3	6	6
	4	4	7	1	4	4	4	4	4	5	5
	5	3	6	2	3	2	1	5	2	5	5
	5	5	6	2	6	2	3	6	2	5	5
	6	5	3	3	5	3	3	5	3	7	6
	5	5	2	5	4	2	4	5	7	6	6
	6	3	5	3	5	2	2	6	6	5	5
	2	2	6	2	3	1	1	5	2	3	2
	6	2	4	2	2	1	1	6	3	5	2
	5	3	5	2	3	1	5	2	5	5	5
	3	4	4	3	4	6	4	4	3	2	2
Ave	4.6	3.6	4.86667	2.6	3.73333	2.2	2.33333	4.46667	3.86667	4.93333	4.66667
raisins	appetite	freshness	dryness	glossiness	warmth	sourness	sweetness	saltiness	looking	fondness	deliciousness
	1	1	6	1	1	1	3	1	1	1	1
	3	3	6	3	1	1	2	5	1	1	2
	3	3	6	3	2	5	1	4	3	3	3
	6	3	5	3	5	6	3	5	5	5	1
	2	2	6	1	1	5	5	5	1	1	2
	4	5	4	4	4	4	5	4	3	3	4
	1	3	7	2	2	6	5	5	1	1	1
	1	7	5	2	2	3	5	3	1	2	1
	5	3	6	2	5	5	6	3	1	3	3
	3	3	4	4	5	2	4	4	5	3	4
	1	2	6	1	1	7	1	7	1	1	1
	3	3	5	3	3	1	5	3	2	3	3
	2	2	6	5	2	5	5	6	1	2	3
	2	2	6	3	2	5	6	3	2	3	2
	2	4	5	4	4	4	5	4	1	2	3
Ave	2.6	3.06667	5.53333	2.73333	2.66667	4	4.06667	4.13333	1.93333	2.26667	2.26667
blueberry	appetite	freshness	dryness	glossiness	warmth	sourness	sweetness	saltiness	looking	fondness	deliciousness
	2	1	7	1	1	5	5	1	5	2	2
	3	2	5	2	3	2	2	3	1	1	2
	2	3	3	5	2	5	5	5	1	1	1
	3	3	5	3	3	5	3	5	2	3	3
	3	6	2	6	1	6	5	1	3	5	2
	4	6	4	4	4	4	5	4	4	4	4
	3	6	2	7	1	6	5	5	2	2	3
	1	7	3	5	2	5	5	3	1	2	1
	6	3	5	3	3	5	5	3	3	7	3
	4	5	1	7	5	4	4	4	6	5	5
	3	3	2	5	1	7	7	2	3	3	3
	5	5	5	4	3	5	5	3	3	3	3
	2	5	3	5	2	6	5	5	1	2	4
	1	5	4	5	2	6	6	2	2	2	2
	5	4	4	5	4	5	5	3	4	5	5
Ave	3.13333	4.26667	3.66667	4.46667	2.46667	5.06667	4.8	3.26667	2.73333	3.13333	2.86667
chocolate	appetite	freshness	dryness	glossiness	warmth	sourness	sweetness	saltiness	looking	fondness	deliciousness
	1	1	7	1	1	1	7	1	1	1	1
	4	3	5	3	5	3	3	7	3	3	3
	1	2	5	3	2	2	5	3	1	2	1
	7	7	2	7	7	5	5	7	7	7	7
	3	2	7	1	1	1	6	5	1	2	3
	3	4	4	4	4	4	6	4	4	4	3
	1	2	6	1	1	1	7	2	1	1	1
	5	7	6	2	3	2	6	6	1	2	3
	6	6	3	5	5	2	6	3	3	3	3
	4	5	4	5	5	3	4	4	5	5	5
	3	3	4	2	1	6	5	2	1	3	2
	2	3	4	3	3	1	6	3	2	2	2
	1	4	4	4	1	1	6	5	1	1	2
	2	2	5	1	3	1	6	2	2	2	2
	7	4	4	2	5	1	5	5	3	6	6
Ave	3.33333	3.66667	4.66667	2.93333	3.13333	2.26667	5.53333	3.93333	2.4	2.93333	2.93333

## Sheet: Table 1
Total Variance Explained
Component	Initial Eigenvalues			Extraction Sums of Squared Loadings			Rotation Sums of Squared Loadings
	Total	% of Variance	Cumulative %	Total	% of Variance	Cumulative %	Total	% of Variance	Cumulative %
1	6.295	57.223	57.223	6.178	56.162	56.162	4.933	44.849	44.849
2	2.049	18.631	75.854	1.83	16.634	72.796	3.041	27.646	72.495
3	1.179	10.72	86.574	0.864	7.858	80.654	0.898	8.159	80.654
4	0.581	5.279	91.853
5	0.357	3.249	95.102
6	0.275	2.496	97.597
7	0.107	0.977	98.574
8	0.07	0.64	99.214
9	0.034	0.305	99.52
10	0.03	0.275	99.795
11	0.023	0.205	100
Extraction Method: Principal Component Analysis
Rotated Component Matrix a
	Component
	1	2	3
appetite	0.939	0.232	0.014
deliciousness	0.933	0.244	0.04
fondness	0.89	0.284	0.012
looking	0.886	0.372	-0.234
warmth	0.845	0.015	-0.002
sweetness	-0.626	-0.031	-0.002
wetness	0.26	0.953	-0.076
dryness	-0.339	-0.891	-0.045
freshness	0.554	0.715	-0.356
sourness	-0.085	0.699	0.267
saltiness	0.024	0.071	0.797
Extraction Method: Principal Axis Factoring
Rotation Method: Varimax with Kaiser Normalization
a. Roation converged 4 iterations.

## Sheet: Table2
Total Variance Explained
Component	Initial Eigenvalues			Extraction Sums of Squared Loadings			Rotation Sums of Squared Loadings
	Total	% of Variance	Cumulative %	Total	% of Variance	Cumulative %	Total	% of Variance	Cumulative %
1	3.365	48.066	48.066	3.232	46.178	46.178	2.874	41.053	41.053
2	1.543	22.043	70.109	1.176	16.793	62.971	1.455	20.791	61.844
3	1.129	16.124	86.232	0.861	12.295	75.266	0.939	13.421	75.266
4	0.505	7.214	93.446
5	0.325	4.643	98.089
6	0.097	1.381	99.47
7	0.037	0.53	100
Extraction Method: Principal Axis Factoring
Rotated Component Matrix a
	Component
	1	2	3
wetness	0.976	0.19	-0.044
drying	-0.914	-0.237	-0.061
freshness	0.77	0.492	-0.314
sourness	0.686	-0.18	0.265
warmth	0.098	0.841	-0.001
sweetness	-0.088	-0.616	-0.024
saltiness	0.051	0.038	0.874
Extraction Method: Principal Axis Factoring
Rotation Method: Varimax with Kaiser Normalization
a. Roation converged 5 iterations.

## Sheet: Table3_Figure2
Model Summary
Model	R	R Square	Adjusted R Square	Std. Error of the Estimate
1	0.862a	0.742	0.707	0.390863
a. Predictors: (Constant) Factor Score 1, Factor Score 2, Factor Score 3
Coefficients a
Model		Unstandardized Coefficients		Standardized Coefficients	t	Sig.	95.0% Confidence Interval for β		Collinearity Statistics
		β	Std.Error	β			Lower limit	Upper limit	Tolerance	VIF
1	(Constant)	4.259	0.077		55.561	0	4.1	4.418
	Factor Score 1	0.198	0.079	0.272	2.512	0.02	0.035	0.362	0.996	1.004
	Factor Score 2	0.643	0.087	0.801	7.382	0	0.462	0.824	0.994	1.006
	Factor Score 3	0.003	0.087	0.004	0.033	0.974	-0.177	0.183	0.997	1.003
a. Dependent variable: appetite
Collinearity Diagnostics a
Model	Dimension	Eigenvalue	Condition index	Variance Proportions
				(constant)	factor score1	factor score 2	factor score 3
1	1	1.085	1	0	0.26	0.43	0.22
	2	1	1.042	1	0	0	0
	3	0.991	1.046	0	0.45	0	0.56
	4	0.924	1.083	0	0.29	0.57	0.22
a. Dependent variable: appetite

## Sheet: Table4
Total Variance Explained
	Component	Initial Eigenvalues			Extraction Sums of Squared Loadings
		Total	% of Variance	Cumulative %	Total	% of Variance	Cumulative %
Raw	1	2.481	55.521	55.521	2.481	55.521	55.521
	2	1.105	24.727	80.248	1.105	24.727	80.248
	3	0.497	11.121	91.369
	4	0.204	4.569	95.938
	5	0.153	3.419	99.356
	6	0.029	0.644	100
Rescaled	1	2.481	55.521	55.521	2.498	41.639	41.639
	2	1.105	24.727	80.248	1.494	24.907	66.545
	3	0.497	11.121	91.369
	4	0.204	4.569	95.938
	5	0.153	3.419	99.356
	6	0.029	0.644	100
Extraction Method: Principal Component Analysis
Component Matrix a
	Raw Component		Rescaled Component
	component
	1	2	1	2
wetness	0.852	-0.166	0.922	-0.179
dryness	-0.782	0.167	-0.891	0.191
sourness	1.049	0.43	0.869	0.356
saltiness	0.08	0.031	0.189	0.073
sweetness	-0.167	0.834	-0.179	0.893
warmth	0.102	-0.41	0.174	-0.704
Extraction Method: Principal Component Analysis
a. 2 components extracted.

## Sheet: Table5
Total Variance Explained
	Component	Initial Eigenvalues			Extraction Sums of Squared Loadings
		Total	% of Variance	Cumulative %	Total	% of Variance	Cumulative %
Raw	1	3.301	89.326	89.326	3.301	89.326	89.326
	2	0.247	6.678	96.004	0.247	6.678	96.004
	3	0.079	2.132	98.136
	4	0.049	1.32	99.456
	5	0.02	0.544	100
Rescaled	1	3.301	89.326	89.326	4.339	86.771	86.771
	2	0.247	6.678	96.004	0.442	8.847	95.617
	3	0.079	2.132	98.136
	4	0.049	1.32	99.456
	5	0.02	0.544	100
Extraction Method: Principal Component Analysis
Component Matrix a
	Raw Component		Rescaled Component
	component
	1	2	1	2
looking	1.1	0.196	0.973	0.173
appetite	0.691	-0.167	0.957	-0.231
deliciousness	0.834	-0.202	0.954	-0.231
fondness	0.795	-0.146	0.949	-0.174
freshness	0.535	0.344	0.815	0.525
Extraction Method: Principal Component Analysis
a. 2 components extracted.

## Sheet: Figure3
	PC1	PC2
sudachi	1.87218	1.22642
lemon	1.71921	0.58368
lettuce	1.29681	-0.13409
parsely	1.04718	-1.04462
coriander	0.88016	-0.4333
basil	0.85949	-0.19636
tomato	0.7477	1.18402
itallian parsely	0.40568	-0.26753
cucumber	0.30184	0.2437
rosemary	0.21428	-0.54298
sansho	0.20125	-0.73703
pepper	0.12609	-0.5639
dill	0.10706	-1.01055
echallot	0.06333	1.98674
bell pepper	-0.10358	0.09194
no-garnish	-0.15205	-0.7946
pickled ginger	-0.19922	1.09409
boiled-egg	-0.26178	-1.00599
seaweed	-0.26189	-1.17162
mint	-0.3442	-0.40003
blueberry	-0.88409	2.46777
bread	-1.15983	-0.84155
cookie	-1.21395	-0.7326
nuts	-1.50314	-0.77494
chocolate	-1.70207	0.51707
raisins	-2.05644	1.25625

## Sheet: SupplementaryTable1
Garnish	Ave	Mean(std.Dev)
tomato	4.47	1.846
no-garnish	4.47	1.727
cookie	3.73	1.87
nuts	3.07	1.534
bread	3.87	1.685
echallot	3.8	1.971
pickled ginger	3.87	1.685
boiled-egg	4.13	1.767
bell pepper	4.6	1.242
lemon	5.2	1.821
sudachi	5.47	1.846
lettuce	5	1.773
dill	4.07	2.017
pepper	4.27	1.831
coriander	4.67	1.447
cucumber	3.8	1.474
parcely	5.13	1.885
itallian parcely	4.47	1.552
basil	4.67	1.915
mint	4.13	1.598
sansho	4.13	2.264
rosemary	5.07	1.831
seaweed	4.73	1.387
raisins	3	1.69
blueberry	3.33	1.447
chocolate	3.6	2.197

## Sheet: Table6_SupplementaryFigure1
Total Variance Explained
	Component	Initial Eigenvalues			Extraction Sums of Squared Loadings
		Total	% of Variance	Cumulative %	Total	% of Variance	Cumulative %
Raw	1	4.714	57.735	57.735	4.714	57.735	57.735
	2	1.978	24.223	81.959	1.978	24.223	81.959
	3	0.554	6.784	88.743
	4	0.422	5.168	93.911
	5	0.207	2.541	96.451
	6	0.122	1.495	97.946
	7	0.062	0.757	98.703
	8	0.046	0.562	99.265
	9	0.025	0.308	99.573
	10	0.02	0.242	99.814
	11	0.015	0.186	100
Rescaled	1	4.714	57.735	57.735	6.245	56.77	56.77
	2	1.978	24.223	81.959	2.013	18.303	75.073
	3	0.554	6.784	88.743
	4	0.422	5.168	93.911
	5	0.207	2.541	96.451
	6	0.122	1.495	97.946
	7	0.062	0.757	98.703
	8	0.046	0.562	99.265
	9	0.025	0.308	99.573
	10	0.02	0.242	99.814
	11	0.015	0.186	100
Extraction Method: Principal Component Analysis
Component Matrix a
	Raw Component		Rescaled Component
	component
	1	2	1	2
looking	1.067	-0.289	0.944	-0.255
deliciousness	0.779	-0.259	0.891	-0.296
fondness	0.744	-0.234	0.888	-0.28
appetite	0.641	-0.22	0.887	-0.305
freshness	0.579	0.1	0.883	0.152
dryness	-0.697	-0.408	-0.795	-0.465
wetness	0.713	0.486	0.772	0.525
warmth	0.405	-0.269	0.696	-0.462
sweetness	-0.554	0.401	-0.593	0.43
sourness	0.451	1.035	0.374	0.858
saltiness	0.009	0.084	0.021	0.198
Extraction Method: Principal Component Analysis
a. 2 components extracted.

## Sheet: SupplementaryTable2
Factor score
tomato	-0.11045	1.82437	-0.43126
no-garnish	0.24271	-0.50662	1.42816
cookie	-0.21869	-1.49476	-0.27118
nuts	-0.45222	-1.70254	0.81451
bread	-0.23555	-1.33509	0.05929
echallot	-1.15138	1.70041	1.87938
pickled ginger	-0.65039	0.50918	1.54603
boiled-egg	0.42121	-1.05018	0.19477
bell pepper	0.03673	-0.51666	-0.40124
lemon	2.01753	0.1677	0.97099
sudachi	1.10468	1.48494	0.59741
lettuce	0.96733	1.30764	-0.49401
dill	0.16423	-0.70748	-0.60259
pepper	0.05448	0.08412	-0.81619
coriander	0.92763	0.19495	-0.50233
cucumber	0.00596	0.60176	0.35161
parcely	1.52088	-0.23985	-1.45478
itallian parcely	0.24038	0.27183	-0.20329
basil	0.33599	0.94678	-0.89013
mint	-0.38697	-0.28691	-1.56354
sansho	0.20488	-0.2575	-0.43279
rosemary	0.49773	-0.05554	0.02309
seaweed	0.47371	-1.24695	1.25071
raisins	-2.15644	-0.64891	0.20677
blueberry	-2.28536	1.29816	-0.91591
chocolate	-1.56862	-0.34287	-0.34351

[truncated: 2 more sheets: open-question, ave]
